# Supplementary material
Source: PubMed Central journal article supplement (PMC1895941)

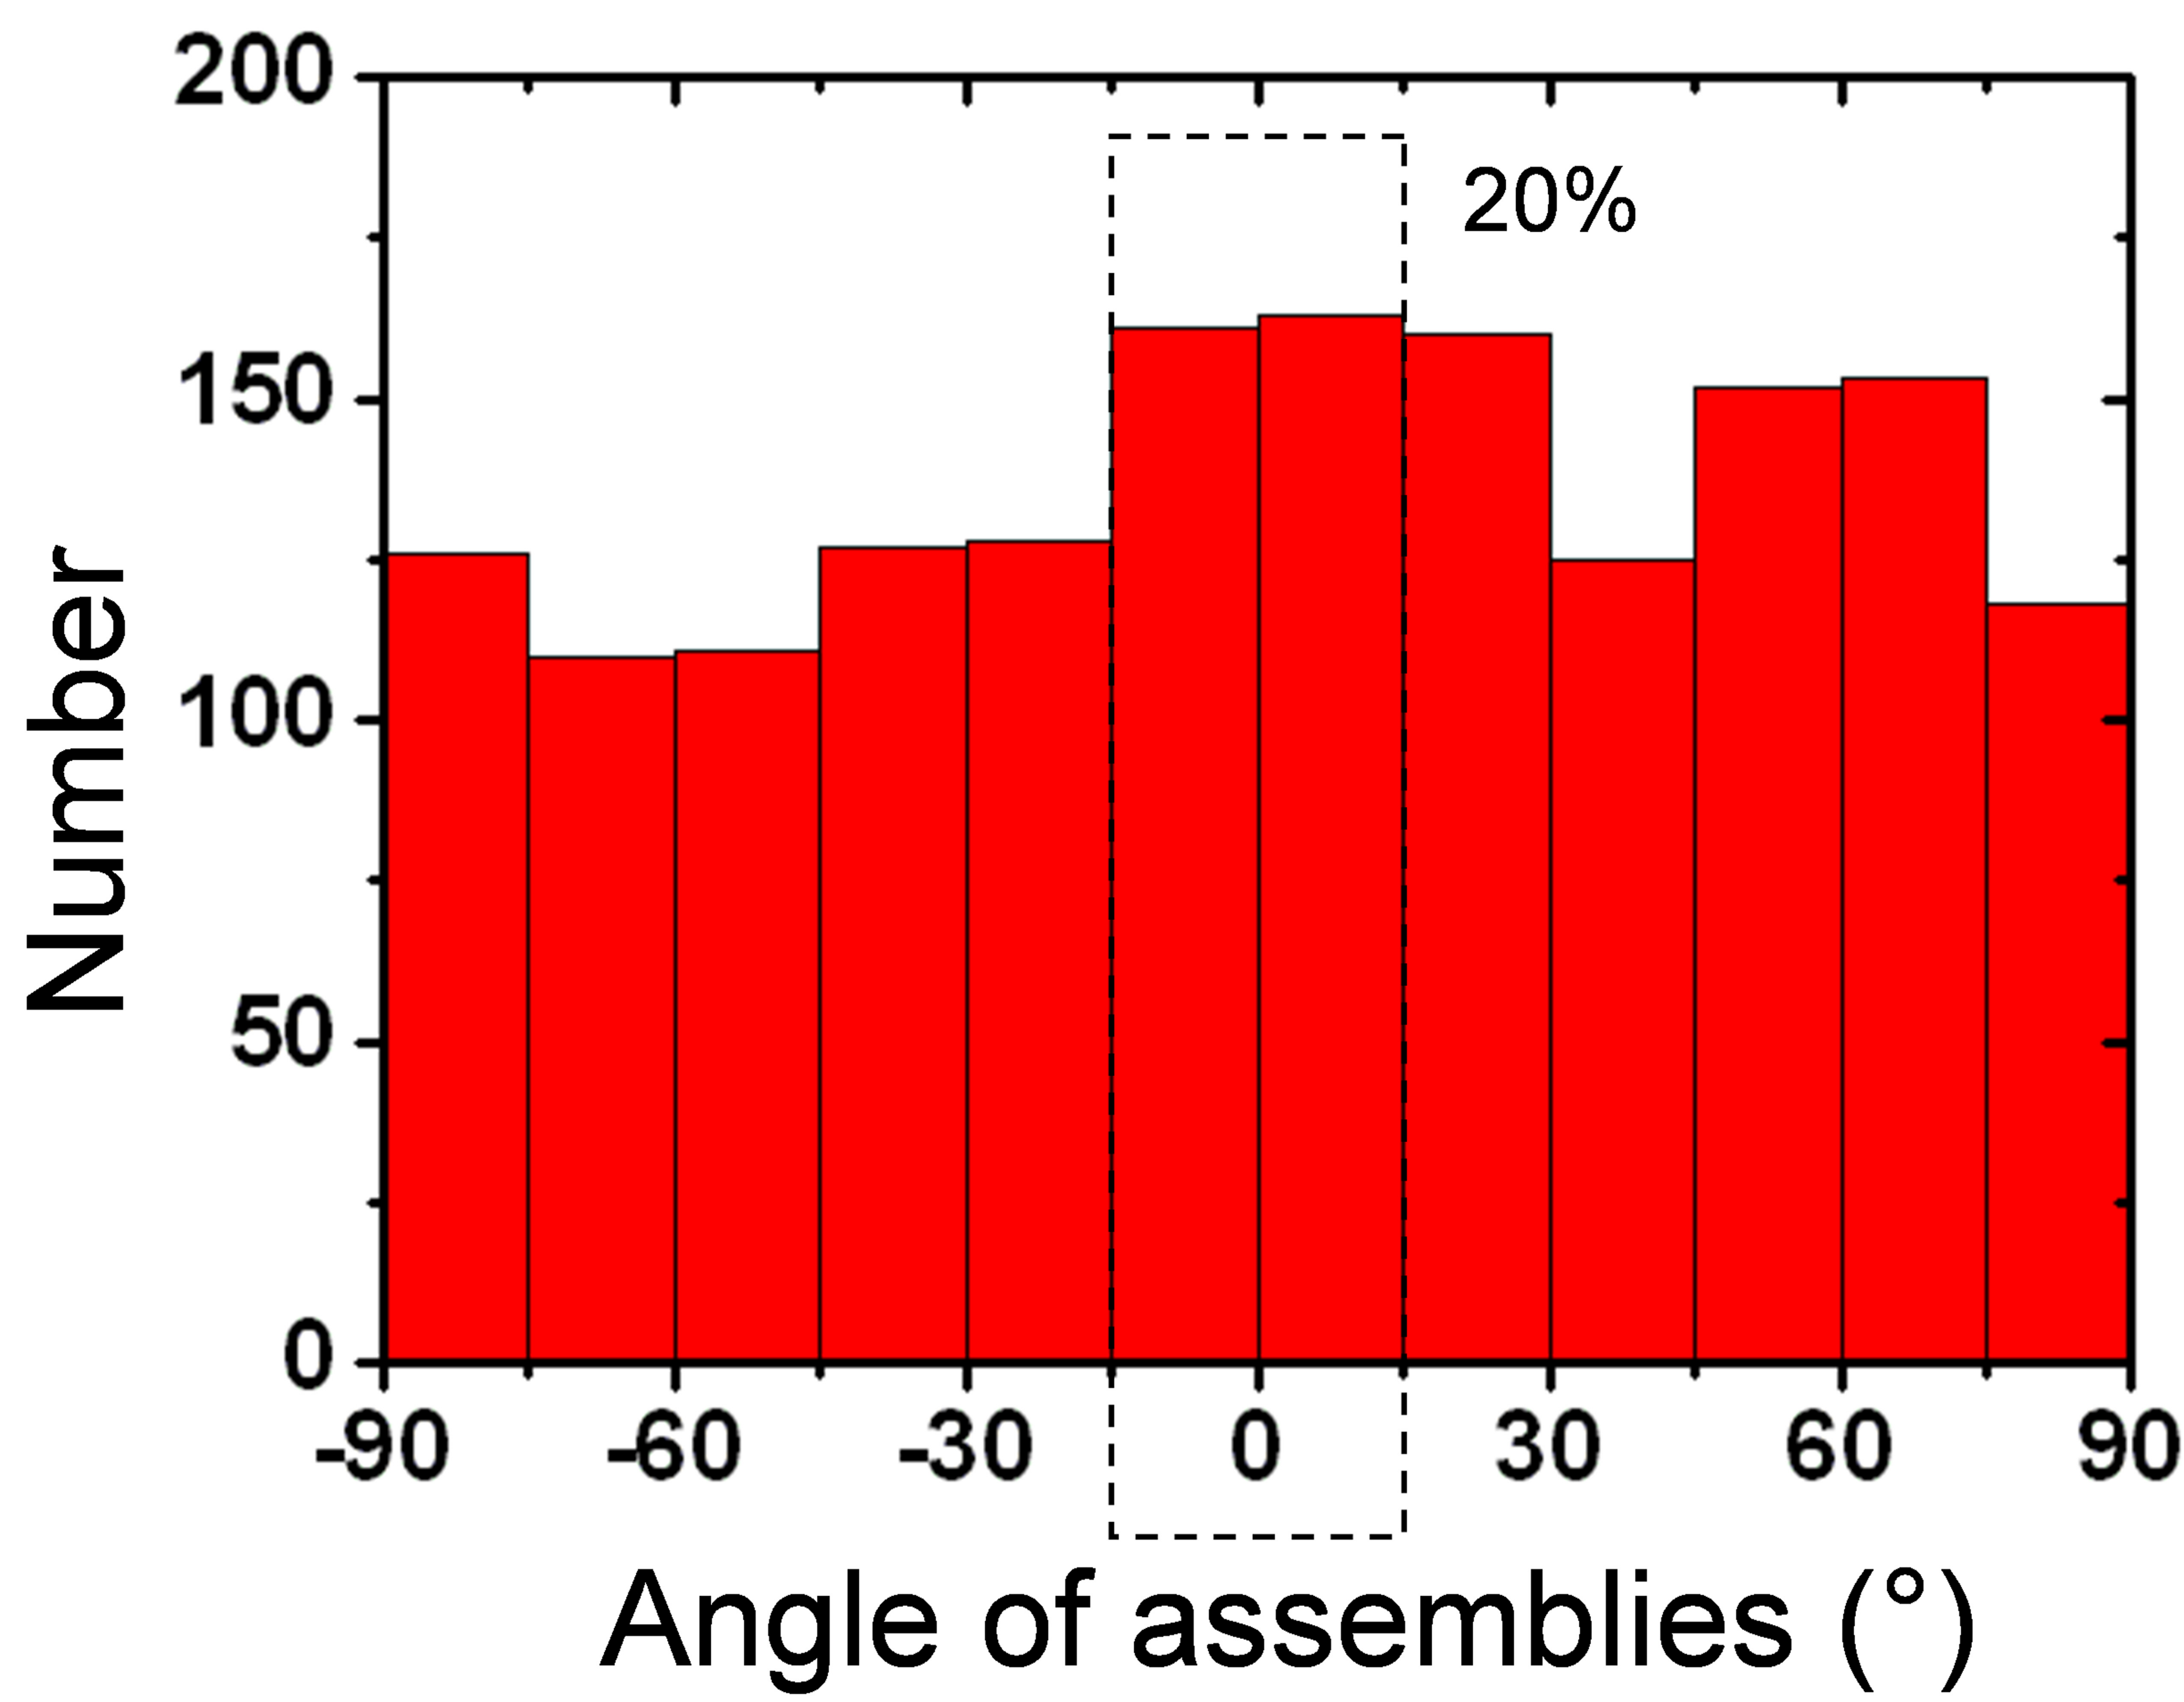

Supplement: pnas_0702259104_1.pdf [file pnas_0702259104_1.pdf]

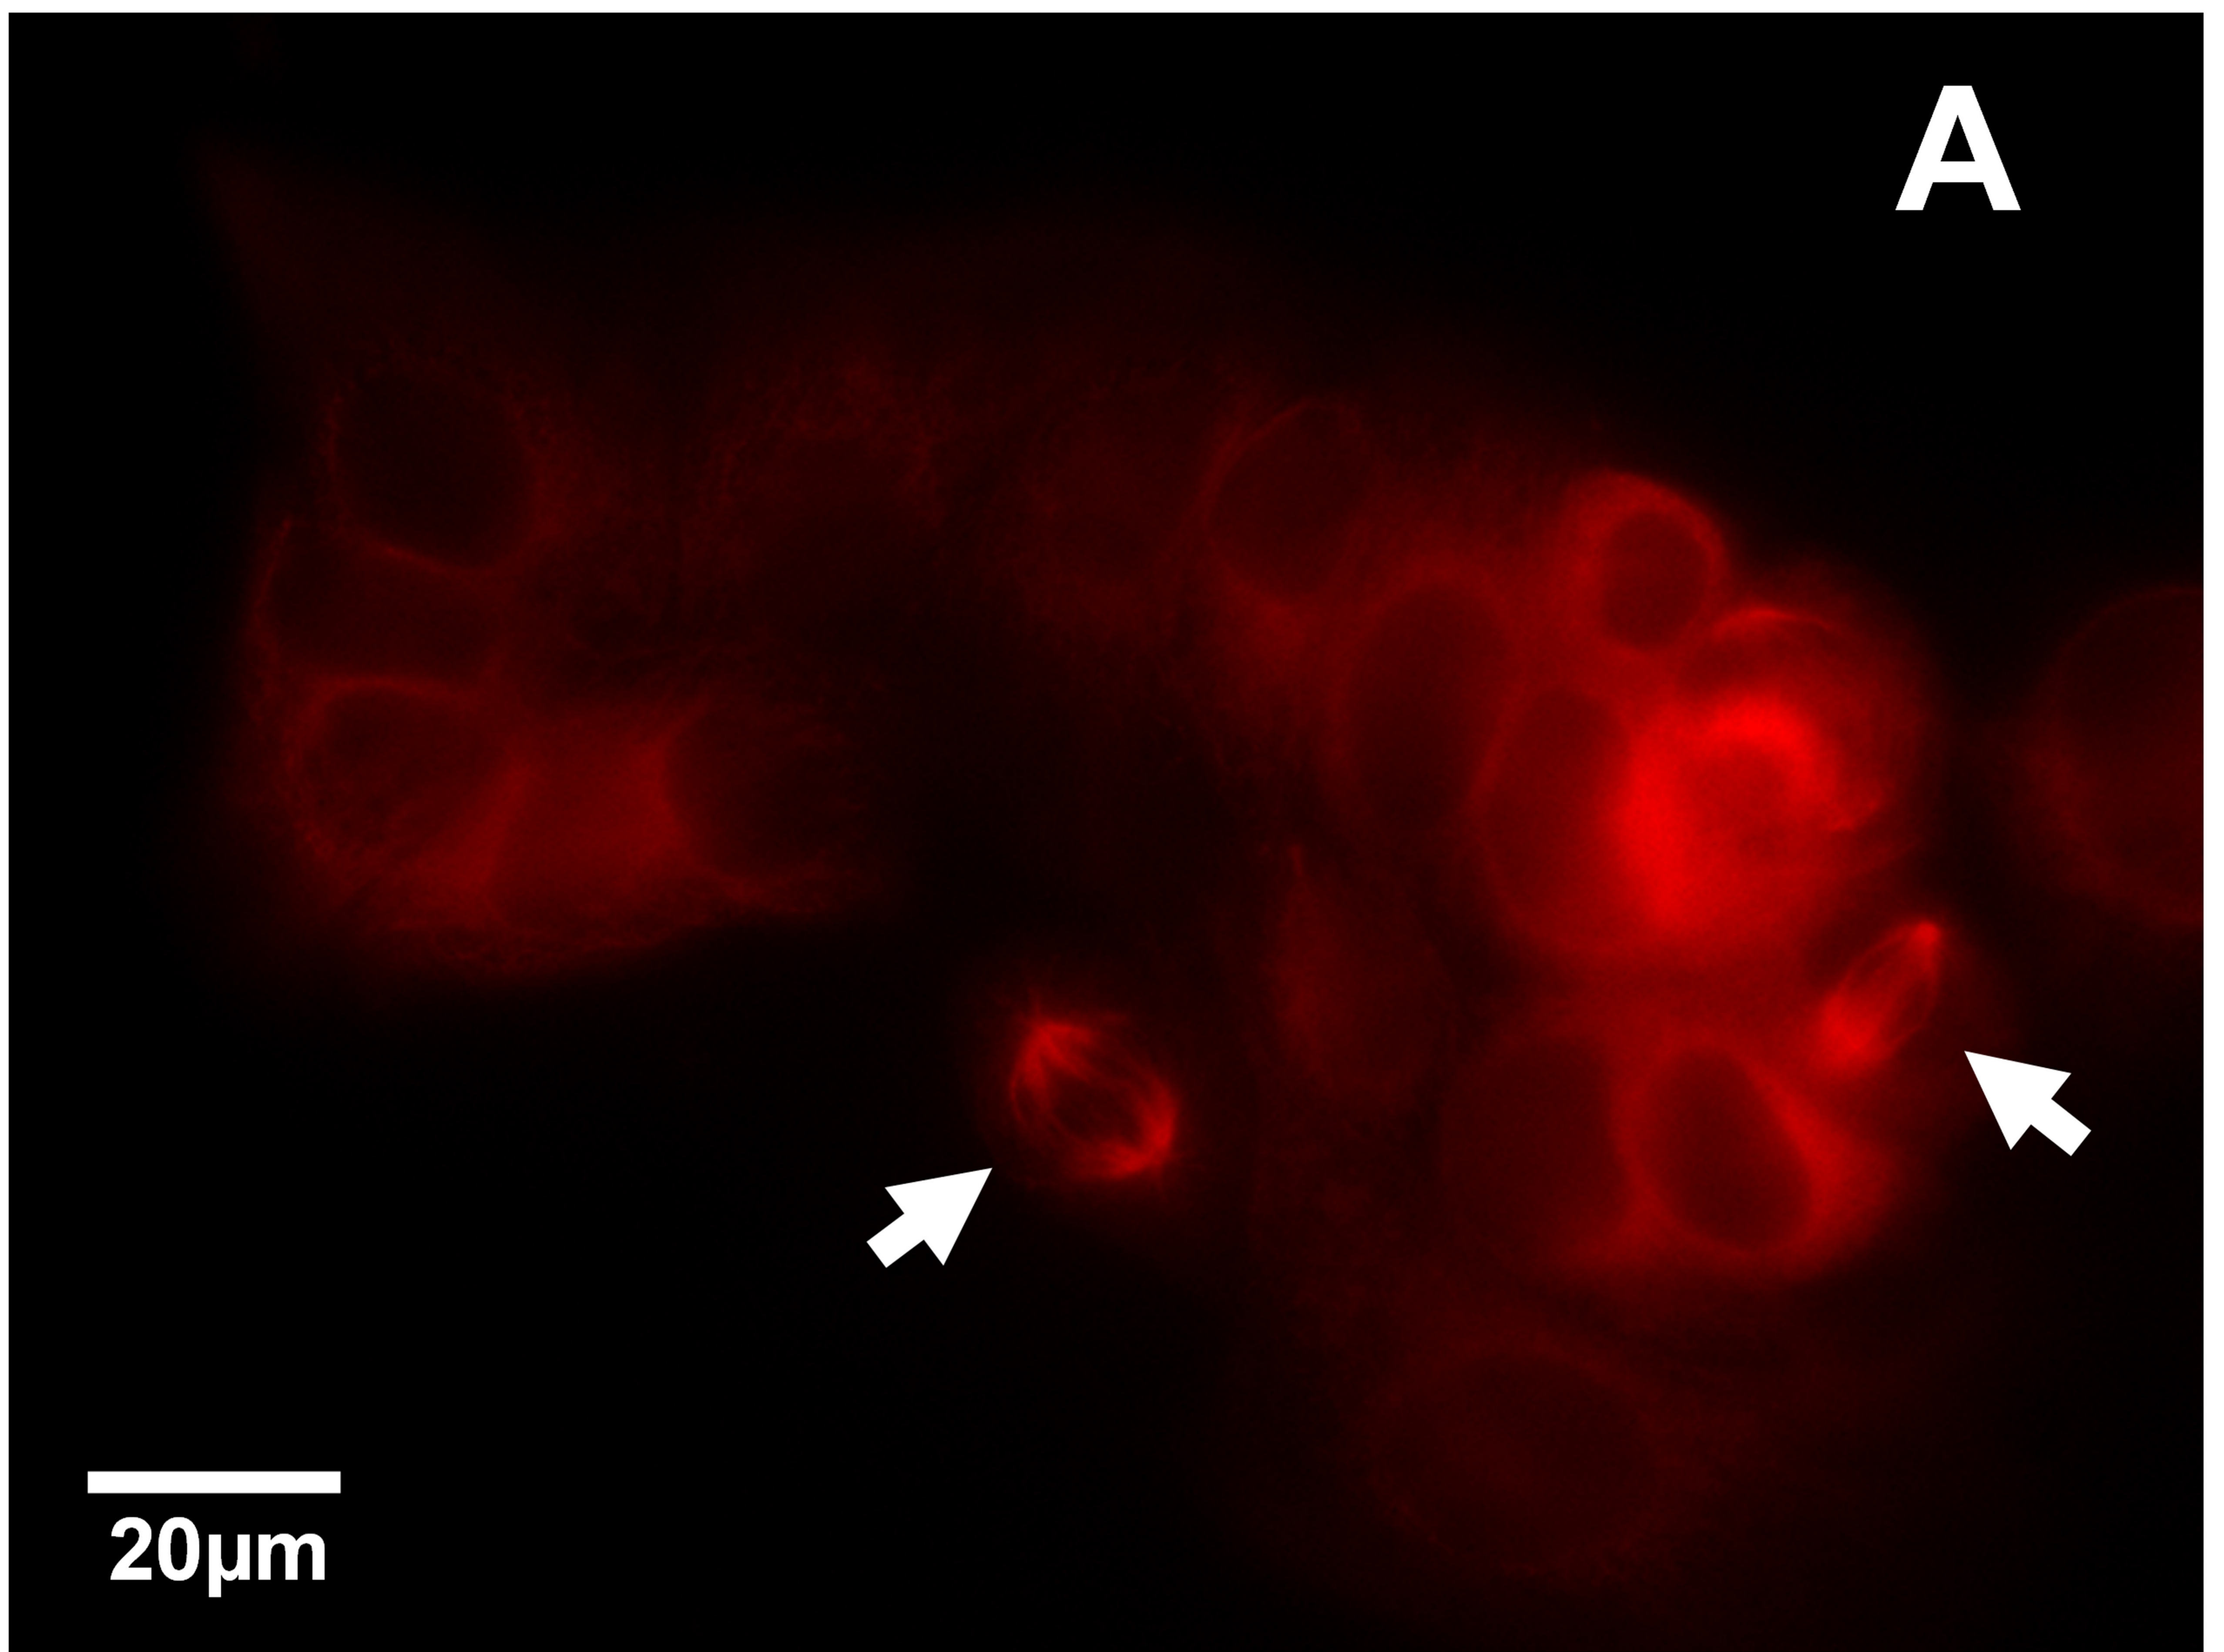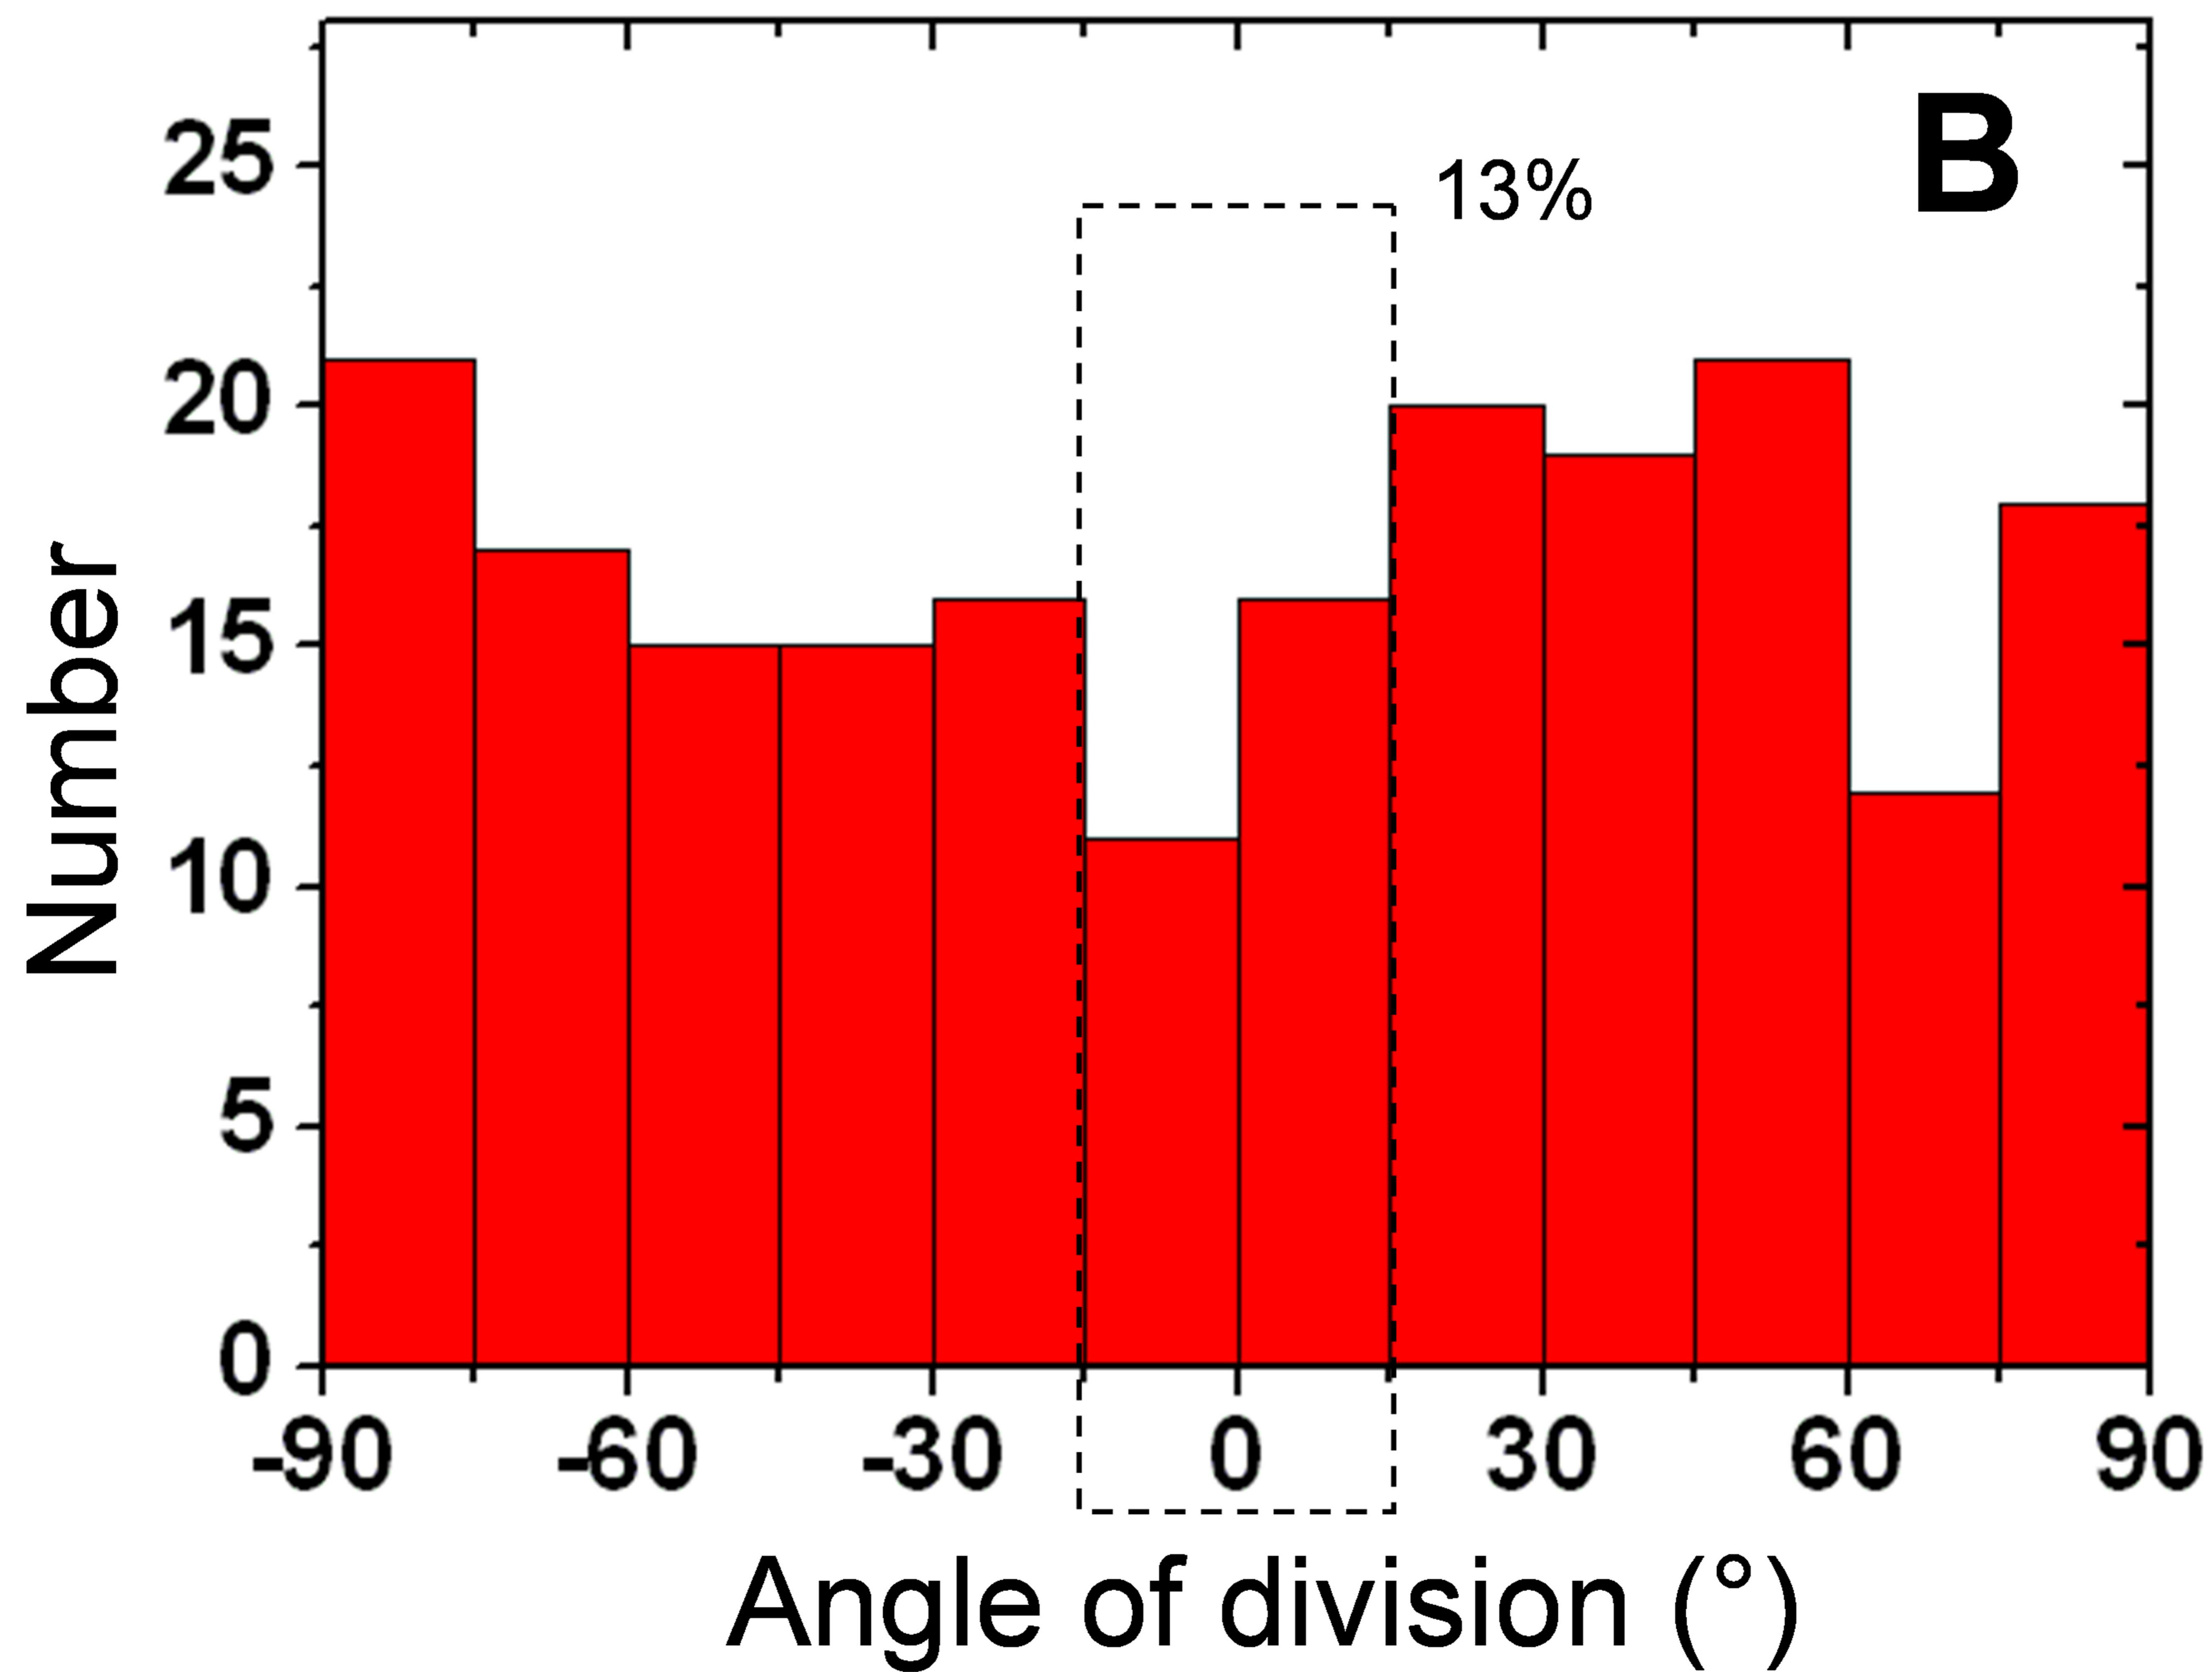

Supplement: pnas_0702259104_2.pdf [file pnas_0702259104_2.pdf]

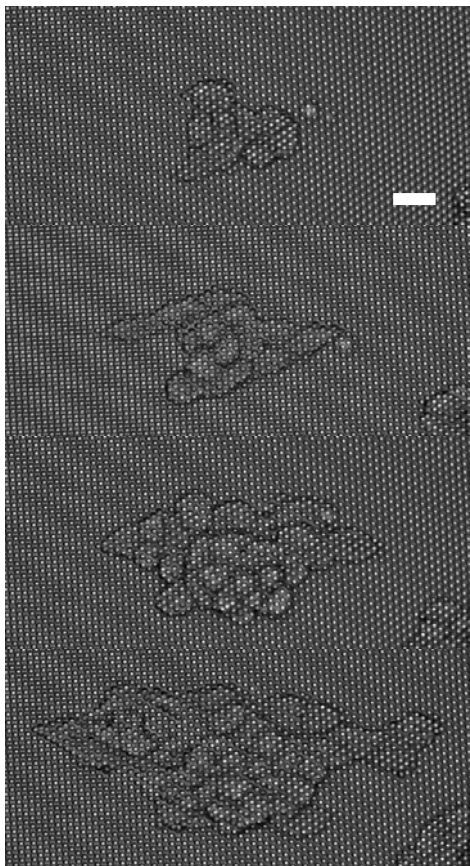

Supplement: pnas_0702259104_3.pdf [file pnas_0702259104_3.pdf]

**Number**

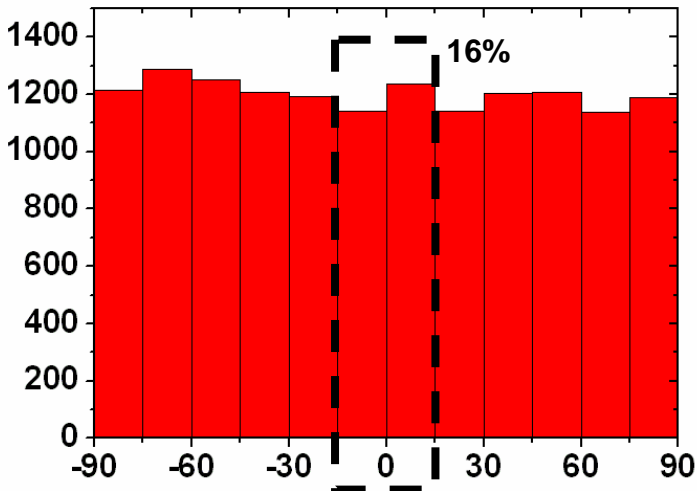

**Angle of steps (°)**

Supplement: pnas_0702259104_4.pdf [file pnas_0702259104_4.pdf]

# Orientation of cell assemblies

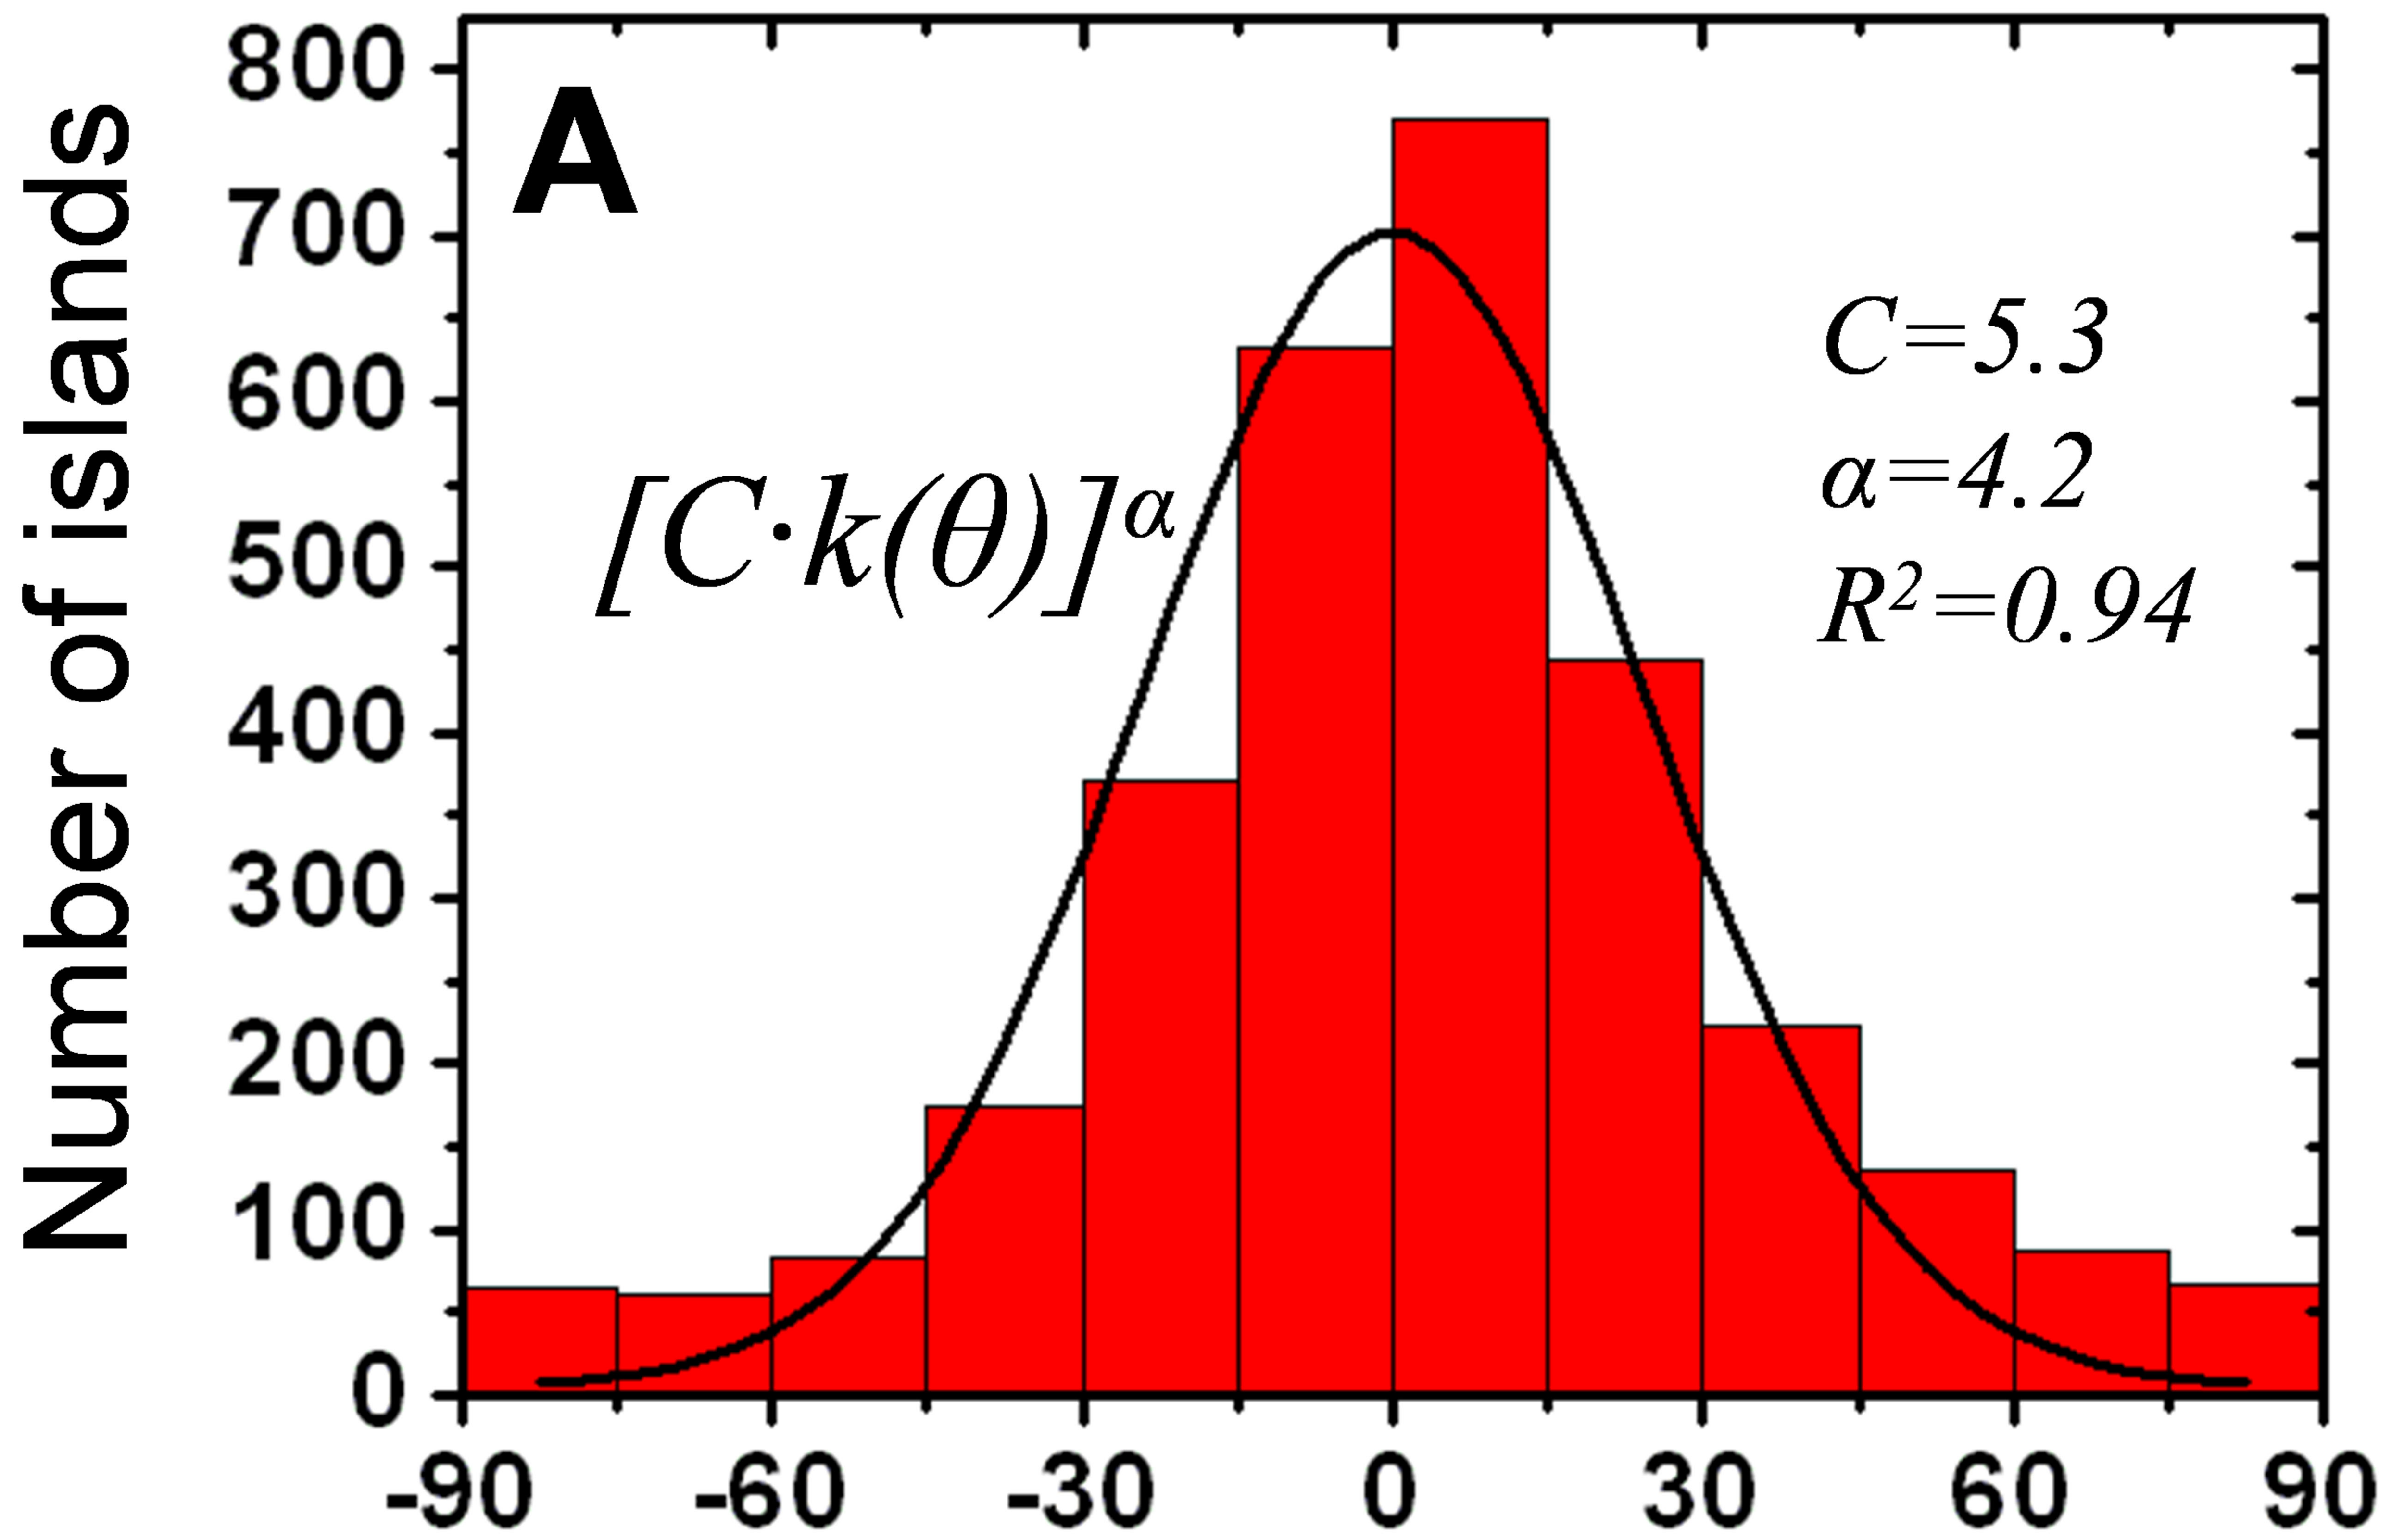

# Orientation of cell migration

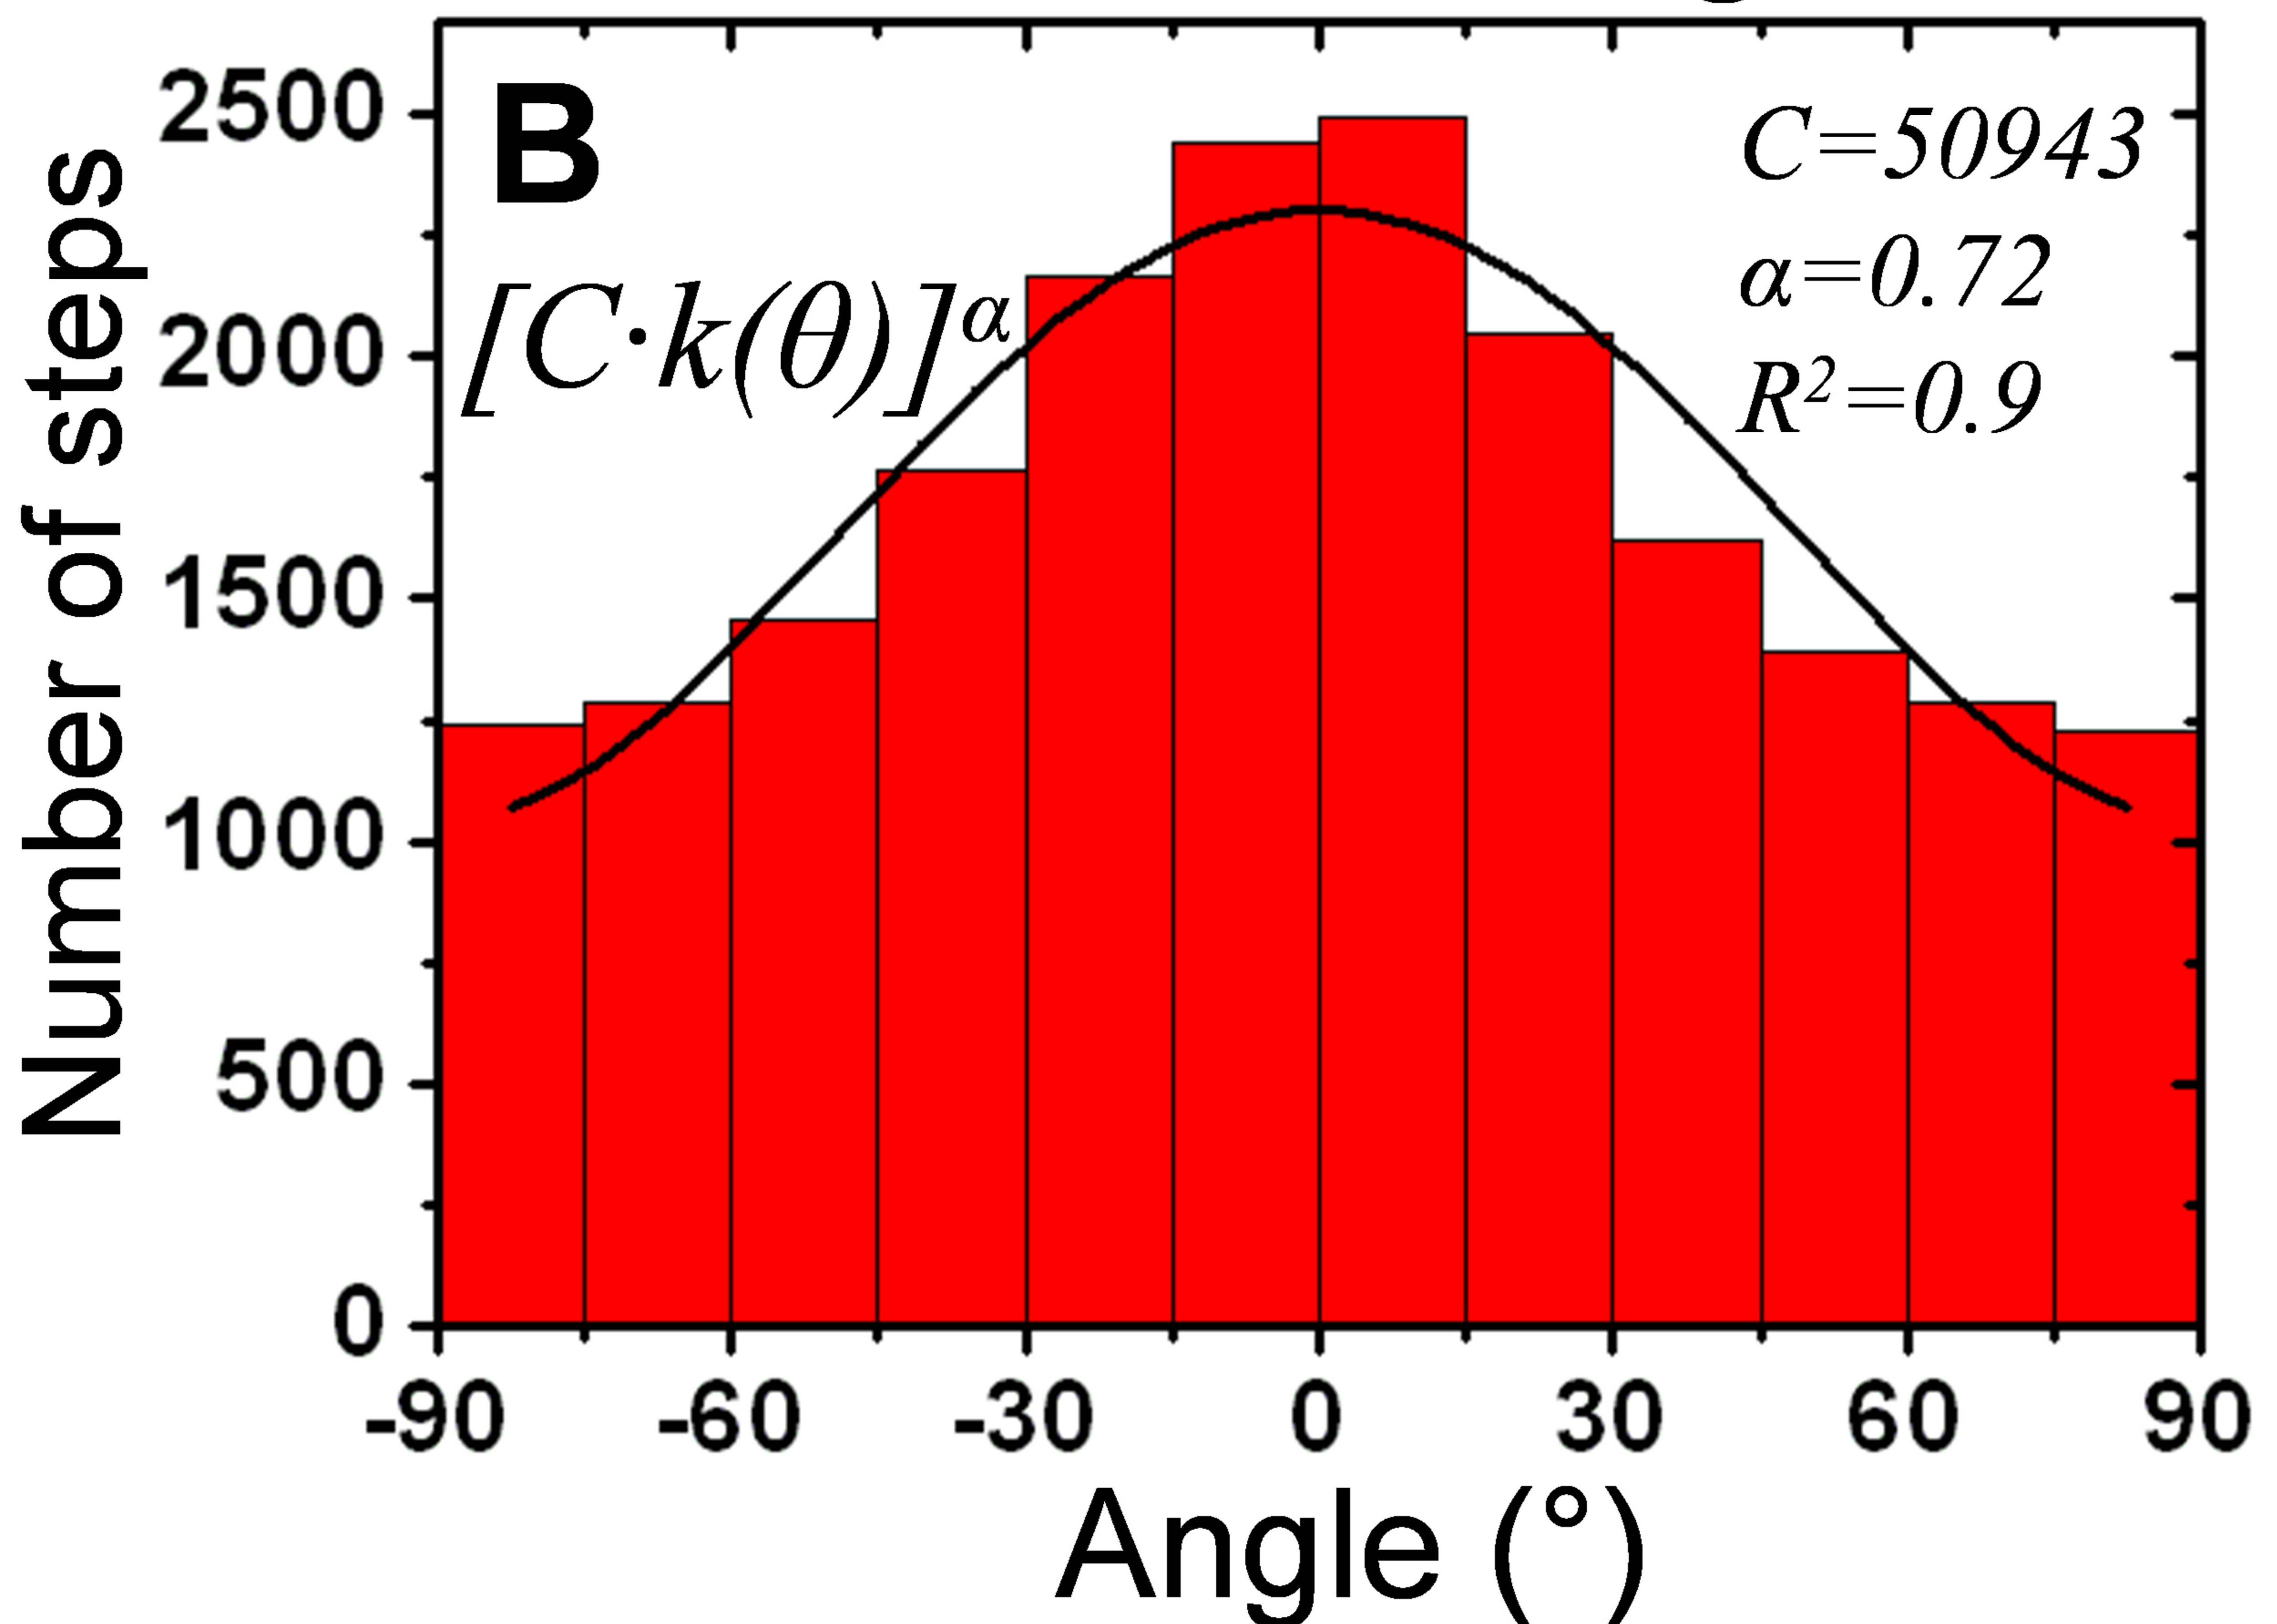

Supplement: pnas_0702259104_5.pdf [file pnas_0702259104_5.pdf]
